# Supplementary material for: Identification of SPHK1 as a therapeutic target and marker of poor prognosis in cholangiocarcinoma
Source: PubMed Central journal article supplement (PMC4695139; doi:10.18632/oncotarget.4335), 2015-06-02
Supplement: oncotarget-06-23594-s001.pdf [file oncotarget-06-23594-s001.pdf]

## Identification of SPHK1 as a therapeutic target and marker of poor prognosis in cholangiocarcinoma

### Supplementary Material

**Supplementary Table 1. Up-regulated probe IDs and corresponding genes**

| <b>Probes</b> | <b>Genes</b> | <b>Fold change</b> |
|---------------|--------------|--------------------|
| NM_032432     | ABLIM2       | 2.13               |
| NM_001109     | ADAM8        | 2.31               |
| NM_198576     | AGRN         | 2.04               |
| NM_001012302  | ANO9         | 2.01               |
| NM_033520     | C19orf33     | 6.87               |
| NM_014008     | CCDC22       | 2.24               |
| NM_016564     | CEND1        | 2.56               |
| NM_000095     | COMP         | 3.44               |
| NM_001311     | CRIP1        | 2.8                |
| NM_004395     | DBN1         | 2.93               |
| NM_033178     | DUX4L1       | 2.22               |
| XM_374852     | DUX4L11      | 2.12               |
| XM_496731     | DUX4L4       | 2.25               |
| NM_001023569  | DUX4L9       | 2.05               |
| NM_000149     | FUT3         | 2.03               |
| NM_053044     | HTRA3        | 2.2                |
| NM_002276     | KRT19        | 5.73               |
| NM_005556     | KRT7         | 5.18               |
| NM_000228     | LAMB3        | 5.25               |
| NM_002304     | LFNG         | 2.28               |
| XM_927367     | LOC377711    | 2.51               |
| NM_001013637  | LOC388022    | 2.15               |
| XM_372046     | LOC389667    | 2.55               |
| XM_926221     | LOC653091    | 2.2                |
| XM_927996     | LOC653541    | 2.19               |
| NM_173481     | MISP         | 3.12               |
| NM_005940     | MMP11        | 3.37               |
| NM_015392     | NPDC1        | 2.03               |
| NM_022463     | NXN          | 2.51               |
| NM_005764     | PDZK1IP1     | 3.51               |
| NM_182470     | PKM          | 4.06               |

|           |          |      |
|-----------|----------|------|
| NM_002654 | PKM      | 3.98 |
| NM_017514 | PLXNA3   | 2.03 |
| NM_002773 | PRSS8    | 2.11 |
| NM_007079 | PTP4A3   | 2.05 |
| NM_020387 | RAB25    | 2.38 |
| <hr/>     |          |      |
| NM_014624 | S100A6   | 2.57 |
| NM_006142 | SFN      | 4.66 |
| NM_004207 | SLC16A3  | 5.01 |
| NM_198857 | SLC6A10P | 2.63 |
| NM_021972 | SPHK1    | 2.75 |
| XM_925801 | TBC1D3D  | 2.03 |
| NM_017899 | TESC     | 9.29 |
| NM_024339 | THOC6    | 2.23 |
| NM_213674 | TPM2     | 3.23 |
| NM_003294 | TPSAB1   | 2.29 |
| NM_024164 | TPSB2    | 2.57 |
| NM_005709 | USH1C    | 3.71 |
| NM_080734 | WFDC2    | 2.12 |
| <hr/>     |          |      |

**Supplementary Table 2. Clinicopathological features and SPHK1 expression in patients with cholangiocarcinoma**

|                   | SPHK1 low<br>expression (n = 32) | SPHK1 high<br>expression (n = 64) | <i>p</i> |
|-------------------|----------------------------------|-----------------------------------|----------|
| Age (years)       | 62.04 ± 12.21                    | 59.41 ± 11.57                     | 0.306    |
| Gender            |                                  |                                   | 0.883    |
| Male              | 13 (40.6%)                       | 25 (39.1%)                        |          |
| Female            | 19 (59.4%)                       | 39 (60.9%)                        |          |
| Symptom           |                                  |                                   | 0.007*   |
| No                | 10 (31.3%)                       | 6 (9.4%)                          |          |
| Yes               | 22 (68.8%)                       | 58 (90.6%)                        |          |
| AST (IU/L)        |                                  |                                   | 0.780    |
| ≤34               | 18 (56.3%)                       | 33 (53.2%)                        |          |
| >34               | 14 (43.8%)                       | 29 (46.8%)                        |          |
| ALT (U/L)         |                                  |                                   | 0.851    |
| ≤36               | 18 (62.1%)                       | 36 (60.0%)                        |          |
| >36               | 11 (37.9%)                       | 24 (40.0%)                        |          |
| ALP (U/L)         |                                  |                                   | 0.245    |
| ≤94               | 14 (48.3%)                       | 22 (35.5%)                        |          |
| >94               | 15 (51.7%)                       | 40 (64.5%)                        |          |
| Bilirubin (total) |                                  |                                   | 0.131    |
| ≤1.3              | 30 (93.8%)                       | 52 (81.3%)                        |          |
| >1.3              | 2 (6.3%)                         | 12 (18.8%)                        |          |
| Albumin (g/dl)    |                                  |                                   | 0.065    |
| ≤3.5              | 4 (13.8%)                        | 19 (32.2%)                        |          |
| >3.5              | 25 (86.2%)                       | 40 (67.8%)                        |          |
| Serum CEA (ng/mL) |                                  |                                   | 0.029*   |
| ≤5                | 15 (71.4%)                       | 22 (43.1%)                        |          |
| >5                | 6 (28.6%)                        | 29 (56.9%)                        |          |
| Size (cm)         |                                  |                                   | 0.405    |
| ≤5                | 16 (50.0%)                       | 25 (41.0%)                        |          |
| >5                | 16 (50.0%)                       | 36 (59.0%)                        |          |
| Lymph node        |                                  |                                   | 0.258    |
| Negative          | 24 (75.0%)                       | 39 (60.9%)                        |          |
| Positive          | 8 (25.0%)                        | 23 (35.9%)                        |          |
| Differentiated    |                                  |                                   | 0.726    |
| Well              | 1 (3.1%)                         | 2 (3.1%)                          |          |
| Moderate          | 18 (56.3%)                       | 30 (46.9%)                        |          |
| Poorly            | 12 (37.5%)                       | 31 (48.4%)                        |          |
| Other             | 1 (3.1%)                         | 1 (1.6%)                          |          |
| Margin            |                                  |                                   | 0.100    |
| Negative          | 27 (84.4%)                       | 44 (68.8%)                        |          |
| Positive          | 5 (15.6%)                        | 20 (31.3%)                        |          |
| Post Chemotherapy |                                  |                                   | 0.386    |
| Without (n = 48)  | 18 (56.3%)                       | 30 (46.9%)                        |          |
| With (n = 48)     | 14 (43.8%)                       | 34 (53.1%)                        |          |
| Post Radiotherapy |                                  |                                   | 0.745    |

---

|                  |            |            |
|------------------|------------|------------|
| Without (n = 84) | 29 (90.6%) | 55 (85.9%) |
| With (n = 12)    | 3 (9.4%)   | 9 (14.1%)  |

---

\*statistically significant by multilogistic regression analysis:  $p = 0.006$  for symptom

---

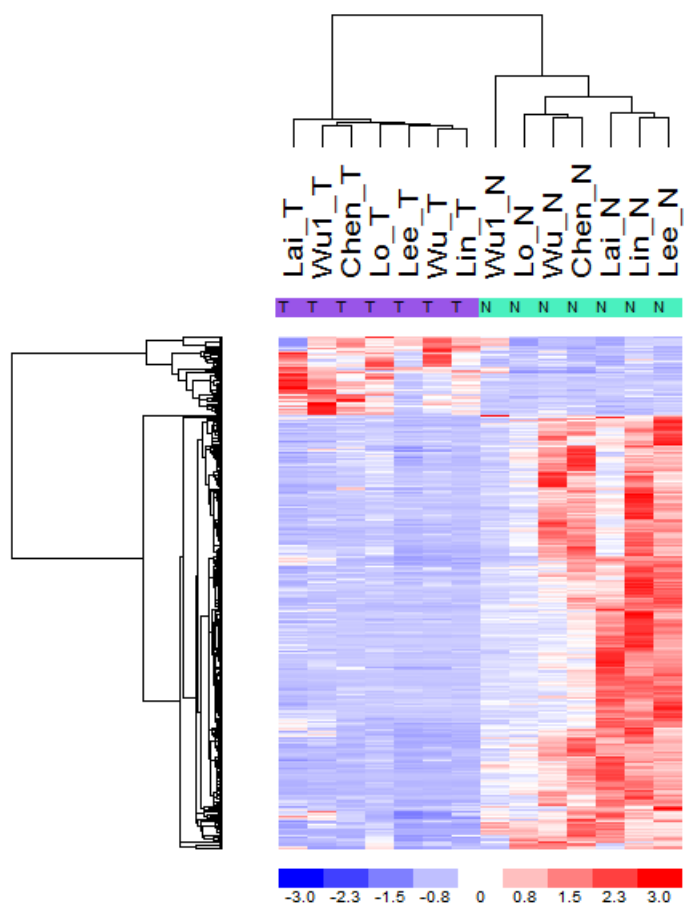

**Supplementary Figure 1.**

**Gene expression heat map of seven paired patients with intrahepatic cholangiocarcinoma**
